# Supplementary material for: Isolation of Macrocyclic Trichothecene Mycotoxins from the Lethal Toxic Mushroom Podostroma cornu-damae and Their Cytotoxic Activities
Source: MDPI journal article supplement (doi:10.3390/separations11030065), 2024-02-20
Supplement: s1 [file s1]

**Table S1.** The percentage ratio of each isolated compound within the total macrocyclic trichothecenes.

| Compounds | Amount of the isolated compound (mg) | Percentage ratio (%) |
|-----------|--------------------------------------|----------------------|
| <b>1</b>  | 5.0                                  | 14.6                 |
| <b>2</b>  | 2.7                                  | 7.9                  |
| <b>3</b>  | 6.0                                  | 17.5                 |
| <b>4</b>  | 3.4                                  | 9.9                  |
| <b>5</b>  | 3.5                                  | 10.2                 |
| <b>6</b>  | 3.7                                  | 10.8                 |
| <b>7</b>  | 5.5                                  | 16.1                 |
| <b>8</b>  | 4.3                                  | 12.6                 |

**Table S2.** Equipment used for analyses.

| Experimental procedure                   | Equipment                                                                                                                                                                                                                                                                  |
|------------------------------------------|----------------------------------------------------------------------------------------------------------------------------------------------------------------------------------------------------------------------------------------------------------------------------|
| Optical rotations                        | Jasco P-2000 polarimeter (Jasco, Easton, MD, USA)                                                                                                                                                                                                                          |
| Ultraviolet (UV) spectra                 | Agilent 8453 UV-visible spectrophotometer (Agilent Technologies, Santa Clara, CA, USA)                                                                                                                                                                                     |
| Infrared (IR) spectra                    | Bruker IFS-66/S FT-IR spectrometer (Bruker, Karlsruhe, Germany)                                                                                                                                                                                                            |
| Nuclear magnetic resonance (NMR) spectra | Bruker AVANCE III HD 800 NMR spectrometer with a 5 mm TCI CryoProbe operating at 800 MHz ( $^1\text{H}$ ) and 200 MHz ( $^{13}\text{C}$ ) with chemical shifts given in ppm ( $\delta$ ) for $^1\text{H}$ and $^{13}\text{C}$ NMR analyses (Bruker, Karlsruhe, Germany).   |
| HR-ESIMS                                 | Agilent G6545B quadrupole time-of-flight mass spectrometer (Agilent Technologies) with Agilent 1290 Infinity II high-performance liquid chromatography (HPLC) instrument [Agilent Eclipse Plus C18 column (2.1 $\times$ 50 mm, 1.8 $\mu\text{m}$ ; flow rate: 0.3 mL/min)] |
| Preparative HPLC                         | Waters 1525 Binary HPLC pump with a Waters 996 Photodiode Array Detector (Waters Corporation, Milford, MA, USA) and an Agilent Eclipse C18 column (250 $\times$ 21.2 mm, 5 $\mu\text{m}$ ; flow rate: 5 mL/min; Agilent Technologies)                                      |
| Semi-preparative HPLC                    | Shimadzu Prominence HPLC System with SPD-20A/20AV Series Prominence HPLC UV-Vis detectors (Shimadzu, Tokyo, Japan) and a Phenomenex Luna C18 column (250 $\times$ 10 mm, 5 $\mu\text{m}$ ; flow rate: 2 mL/min; Phenomenex, Torrance, CA, USA)                             |
| LC/MS analysis                           | Agilent 1200 Series HPLC system equipped with a diode array detector and 6130 Series ESI mass spectrometer using an analytical Kinetex C18 100 Å column (100 $\times$ 2.1 mm, 5 $\mu\text{m}$ ; flow rate: 0.3 mL/min; Phenomenex, Torrance, CA, USA).                     |
| Thin-layer chromatography (TLC)          | Merck pre-coated silica gel F <sub>254</sub> plates and RP-C <sub>18</sub> F <sub>254s</sub> plates (Merck); After thin-layer chromatography, spots were detected under UV light or by heating after spraying with anisaldehyde-sulfuric acid.                             |
