# Supplementary material for: Isolation of Macrocyclic Trichothecene Mycotoxins from the Lethal Toxic Mushroom Podostroma cornu-damae and Their Cytotoxic Activities
Source: MDPI journal article supplement (doi:10.3390/separations11030065), 2024-02-20
Supplement: s1 [file s1]

Archive with 1 entries (1 files):
- separations-2848798-supplementary.pdf
